# Supplementary material
Source: PubMed Central journal article supplement (PMC3243476)

## SUPPLEMENTAL DATA

Structural Characterization of Saturated Branched Chain Fatty Acid Methyl  
Esters by Collisional Dissociation of Electron Impact Activated Molecular Ions

Rinat Ran-Ressler<sup>1</sup>, Peter Lawrence<sup>1</sup>, J. Thomas Brenna\*

Mass spectra of BCFAME as described in Table 1.

FIGURE S1

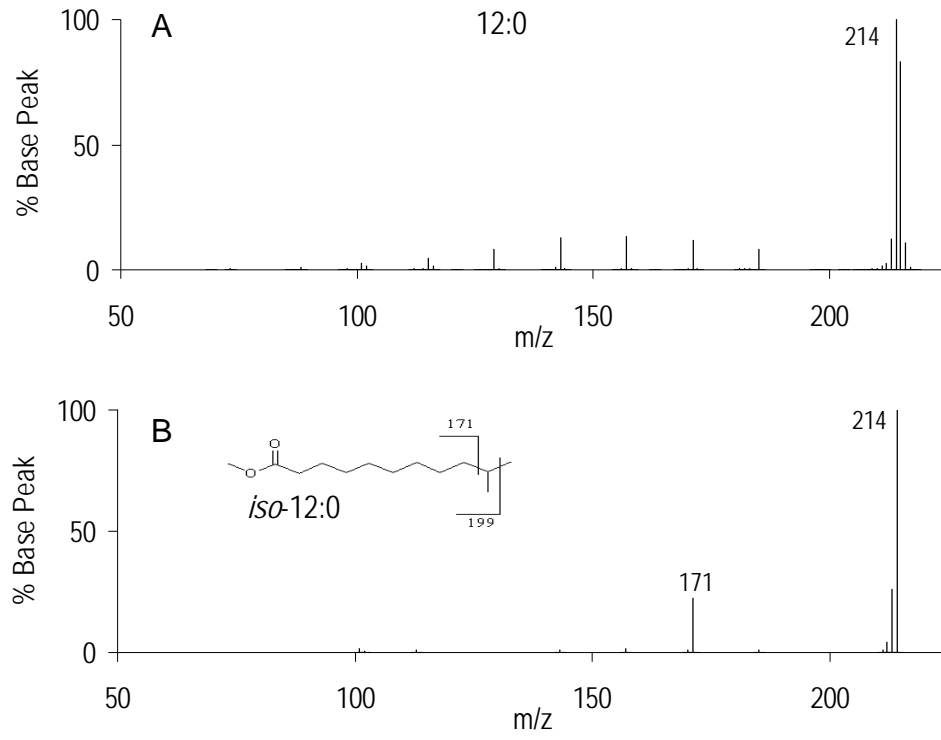

FIGURE S2

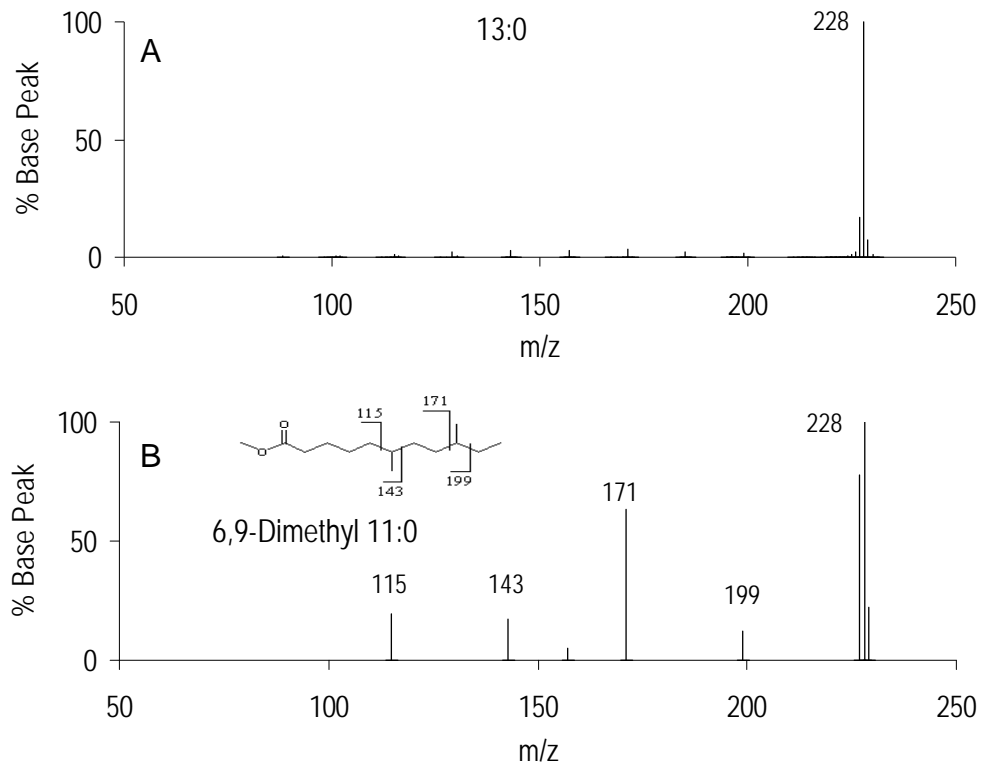

FIGURE S3

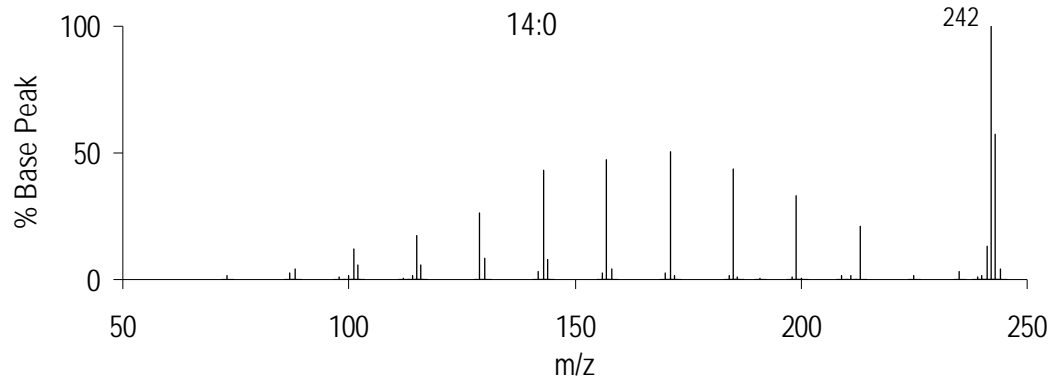

FIGURE S4

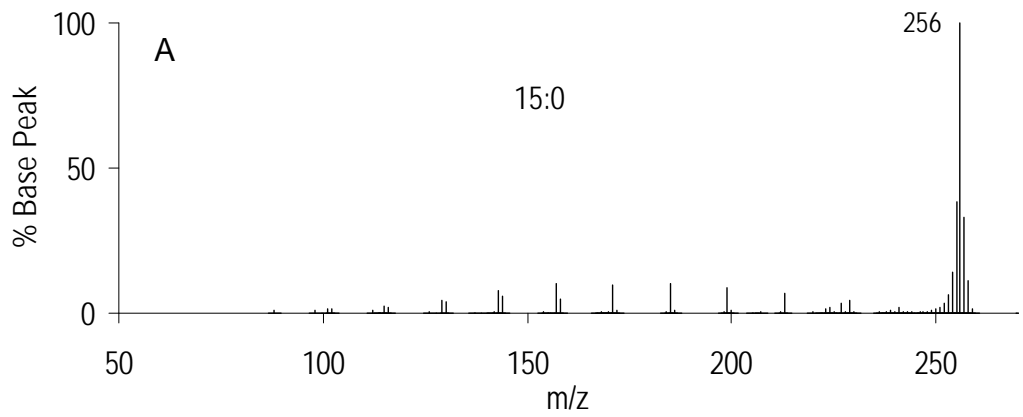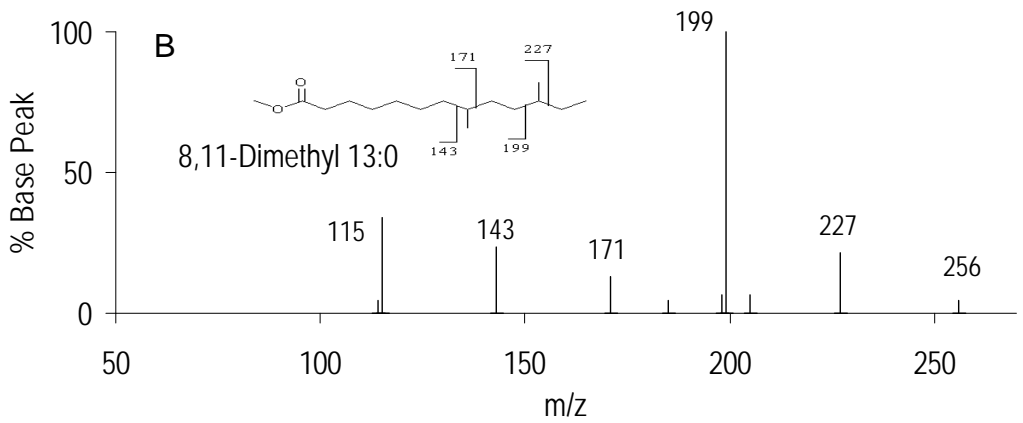

FIGURE S5

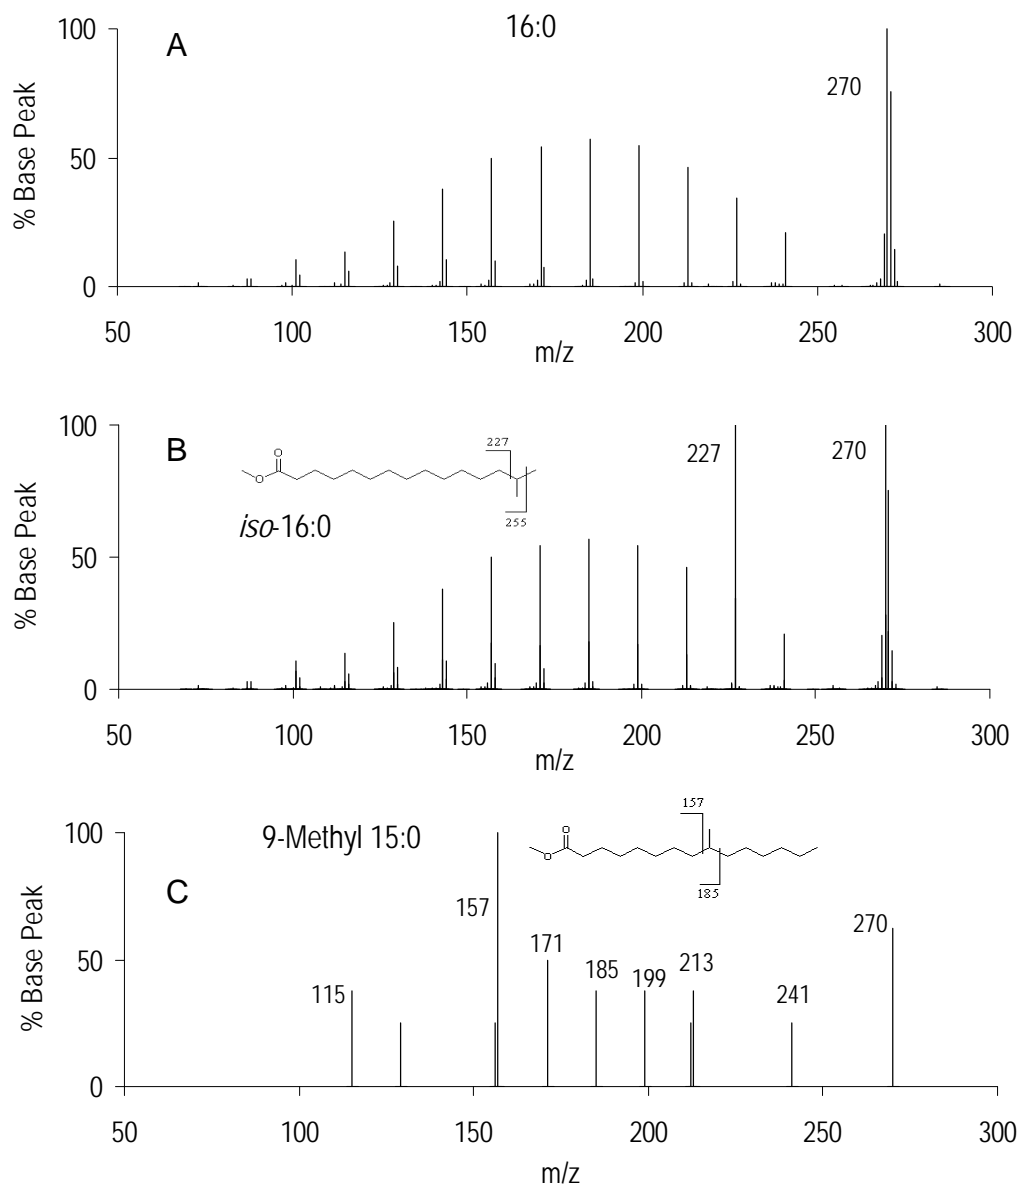

FIGURE S6

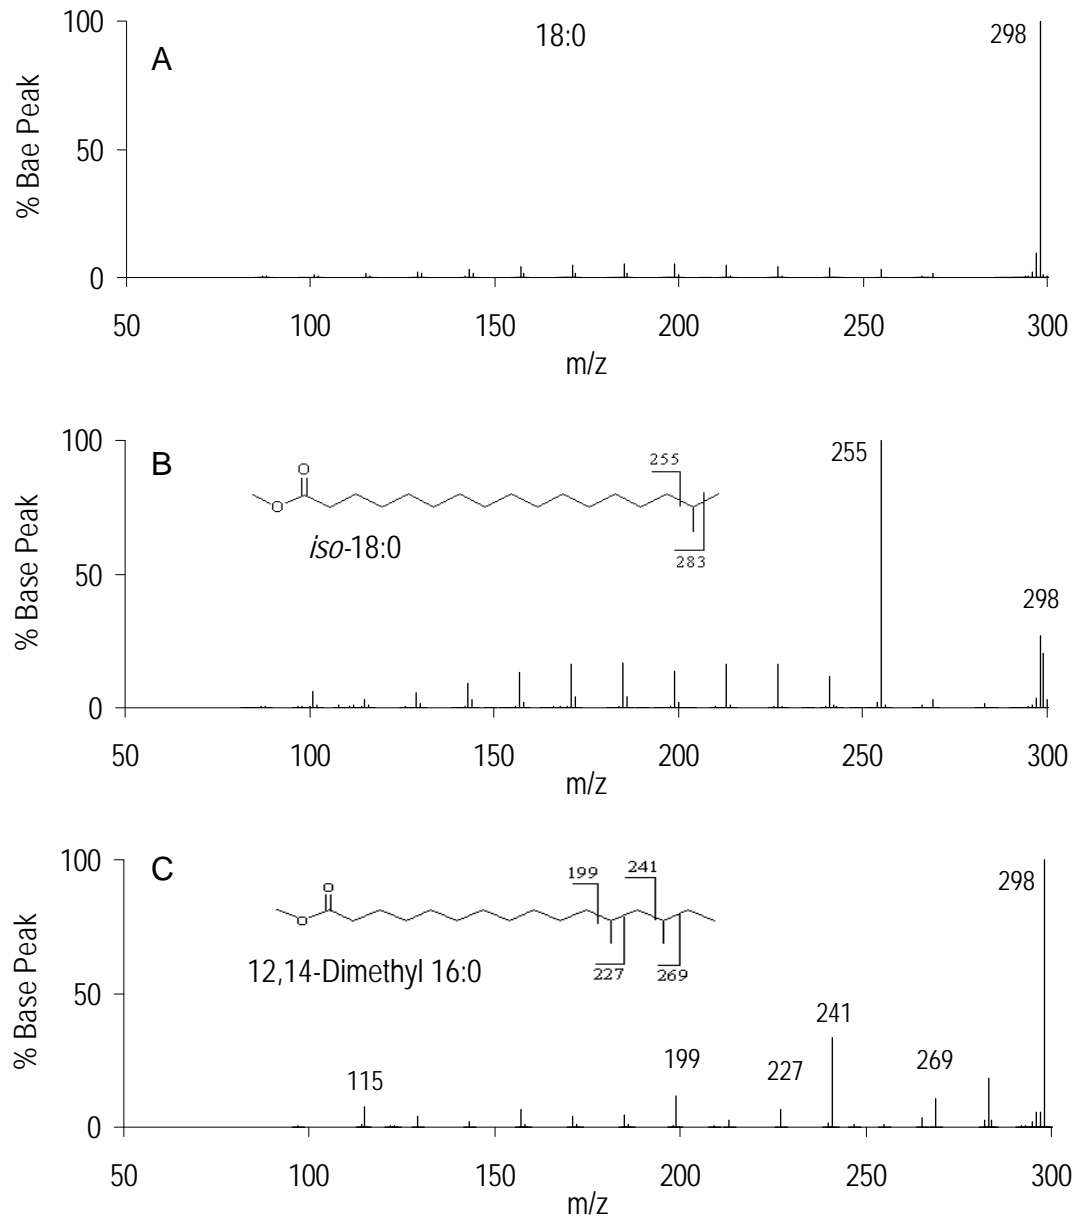

FIGURE S7

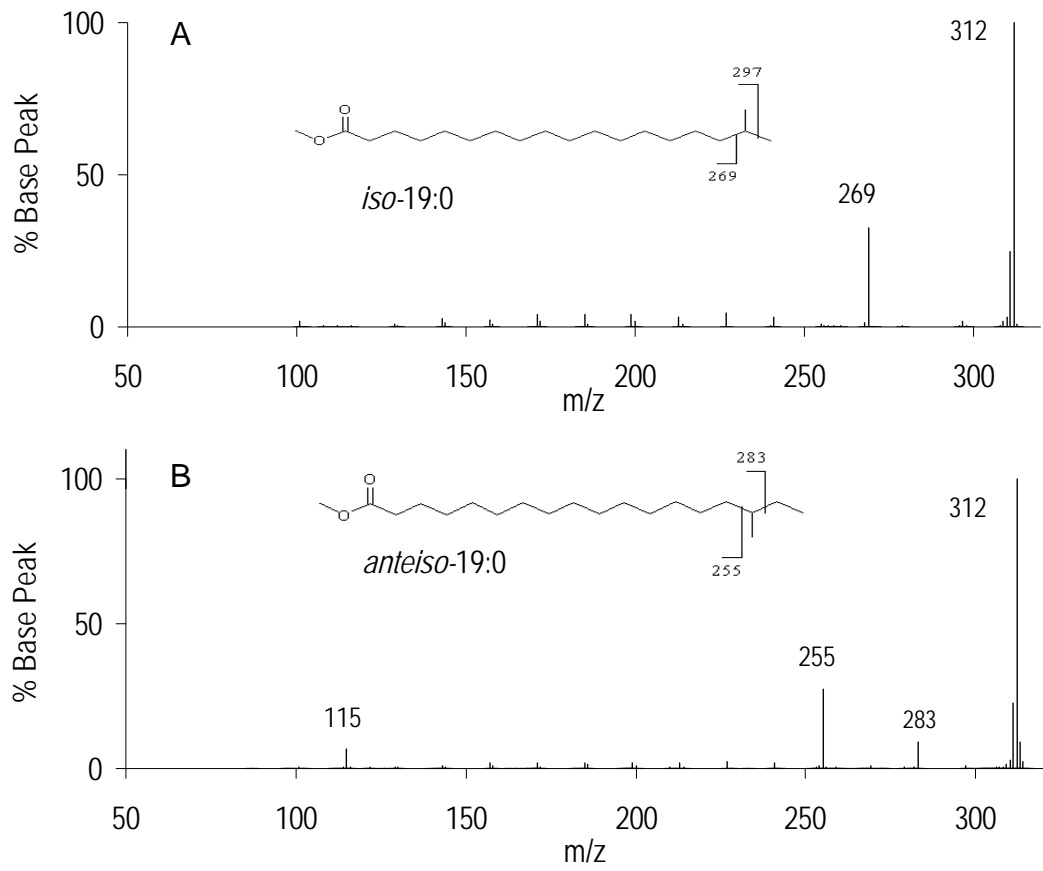

FIGURE S8

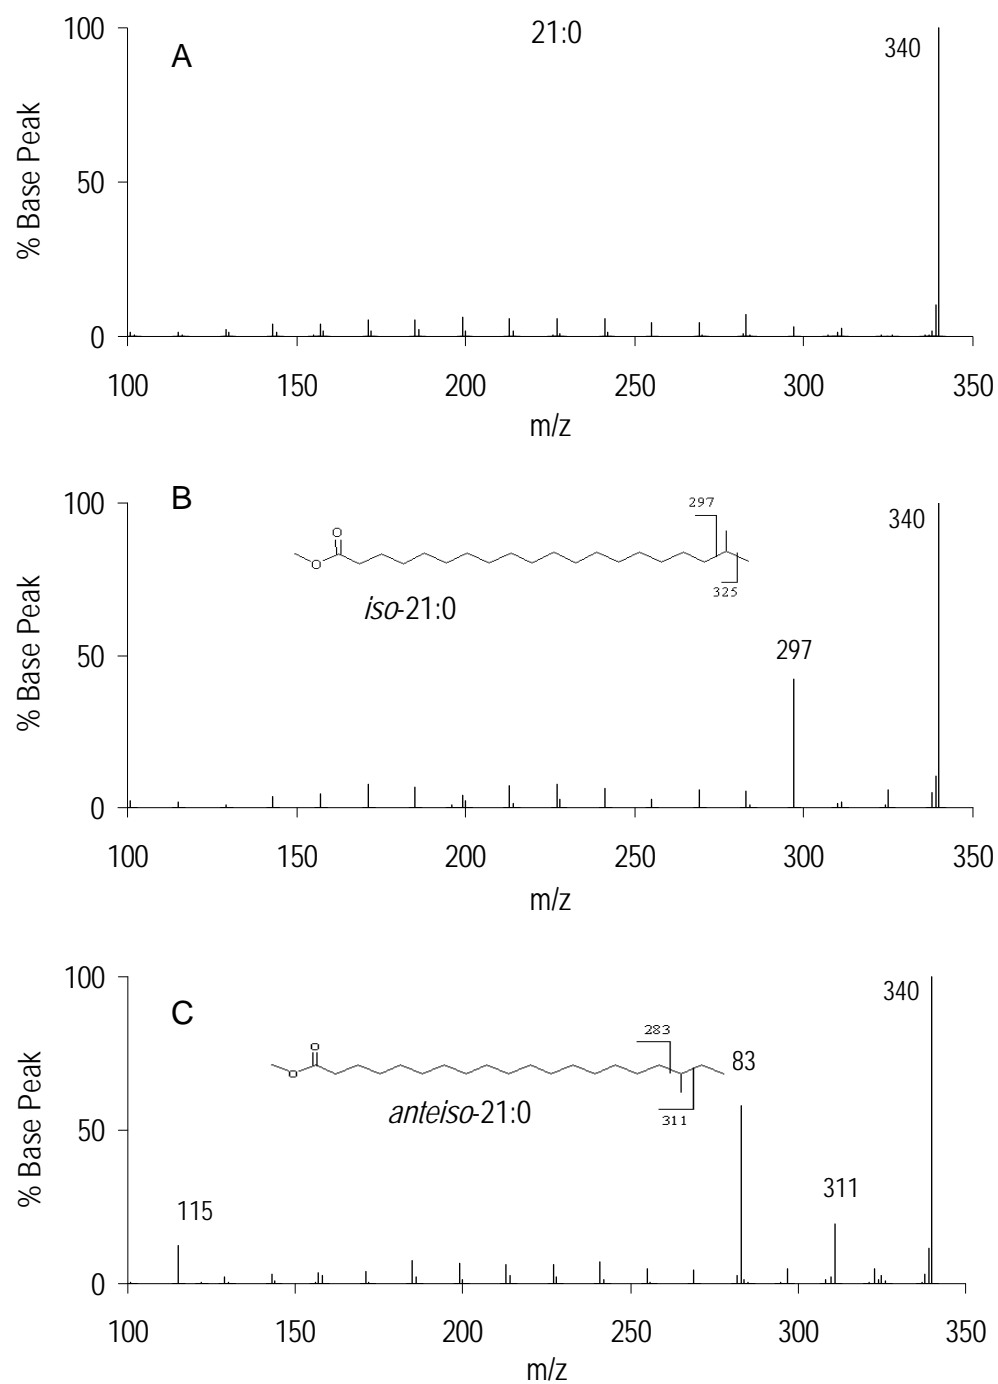



FIGURE S9

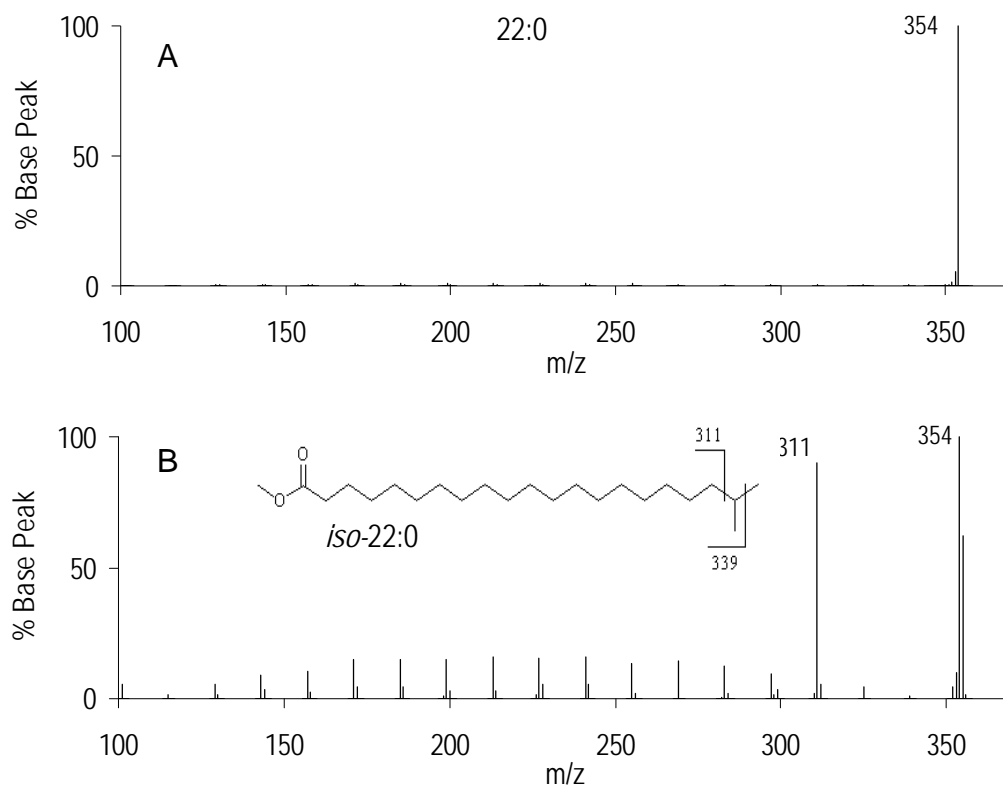

Figure S10

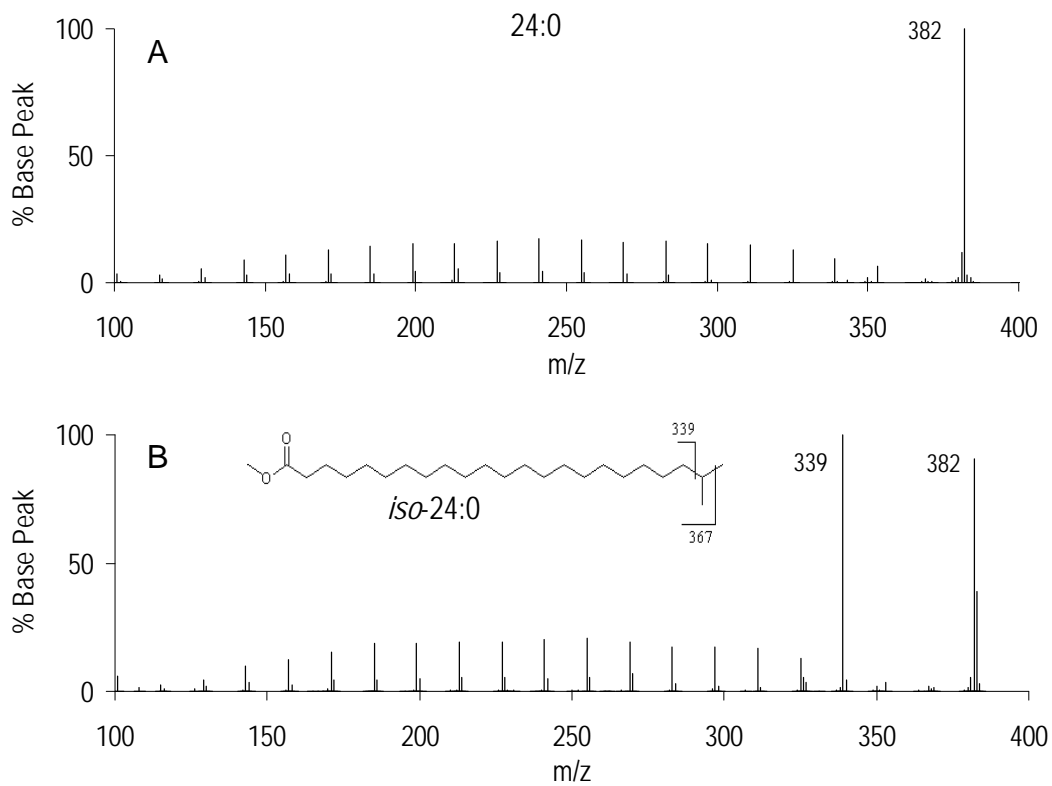

Supplement: supp_D020651_jlr.D020651-1.pdf [file supp_D020651_jlr.D020651-1.pdf]
